# Supplementary material for: Measurement of the Applicability of Abdominal Point-of-Care Ultrasound to the Practice of Medicine in Saudi Arabia and the Current Skill Gaps
Source: PubMed Central journal article supplement (PMC9979944; doi:10.24908/pocus.v6i1.14761), 2021-04-22
Supplement: pocusj-06-14761-s001.pdf [file pocusj-06-14761-s001.pdf]

**Study of the applicability of abdominal point-of-care ultrasound (APOCUS) to medical practice in Saudi Arabia**

**Survey of residents' training, experience, accreditation, and knowledge of APOCUS**

**DEMOGRAPHIC**

**What specialty are you in?**

Internal medicine

**What stage of your career are you in?**

Resident                      PGY-1              PGY-2              PGY-3              PGY-4

**Gender**      Male              Female

**ULTRASOUND EXPERIENCE AND TRAINING**

**Did you receive / are you receiving formal training in APOCUS during post-graduate / residency training**

No              YES              Approximate Total Number of Days of training

**Do you have any formal accreditation in APOCUS?**

No              YES              If Yes - what

**How often do you use APOCUS in clinical practice?**

Never

Once per month      Once per week      3-4x per week      Daily      > Once/day

**Please answer the following questions on a 5 point scale**

1. Very poor    2. Poor    3. Fair    4. Good    5. Very Good

**How applicable to the care of your patients are these indications for APOCUS?**

|                                   |   |   |   |   |   |
|-----------------------------------|---|---|---|---|---|
| Identifying<br>hepatomegaly       | 1 | 2 | 3 | 4 | 5 |
| Identifying<br>splenomegaly       | 1 | 2 | 3 | 4 | 5 |
| Identifying ascites/free<br>fluid | 1 | 2 | 3 | 4 | 5 |
| Identifying<br>hydronephrosis     | 1 | 2 | 3 | 4 | 5 |

**Rate your current level of knowledge and skills in the following domain?**

Knowledge of APOCUS and ability to interpret APOCUS findings (i.e. what is your level of proficiency in APOCUS)?

1. Very poor    2. Poor    3. Fair    4. Good    5. Very Good

Do you have any other comments or concerns?
